# Supplementary material
Source: PubMed Central journal article supplement (PMC4287840)
Supplement: ac504076k_si_001.pdf [file ac504076k_si_001.pdf]

## Supporting information

### Array-based Discovery of Aptamer Pairs

Minseon Cho,<sup>†‡</sup> Seung Soo Oh,<sup>‡</sup> Jeff Nie,<sup>‡</sup> Ron Stewart,<sup>‡</sup> Monte J. Radeke,<sup>‡</sup> Michael Eisenstein,<sup>†‡</sup> Peter J. Coffey,<sup>‡</sup> James A. Thomson,<sup>‡,§</sup> and H. Tom Soh<sup>\*†‡</sup>

<sup>†</sup>Department of Mechanical Engineering, University of California-Santa Barbara, Santa Barbara, California 93106, United States

<sup>‡</sup>Materials Department, University of California-Santa Barbara, Santa Barbara, California 93106, United States

<sup>‡</sup>Morgridge Institute for Research, Madison, Wisconsin 53707, United States

<sup>‡</sup>Neuroscience Research Institute, University of California-Santa Barbara, Santa Barbara, California 93106, United States

<sup>§</sup>Department of Molecular, Cellular, and Developmental Biology, University of California-Santa Barbara, Santa Barbara, California 93106, United States

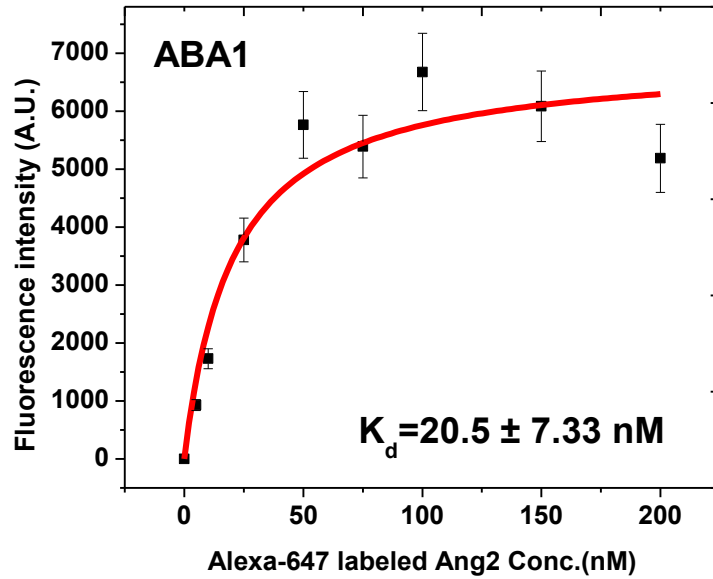

**Figure S1.** Equilibrium binding curve for ABA1. We obtained fluorescence intensities from eight identical arrays incubated with different concentrations of Alexa Fluor 647-labeled Ang2, and ABA1 exhibited the highest affinity/lowest  $K_d$  value ( $K_d = 20.5 \pm 7.3$  nM) (1).

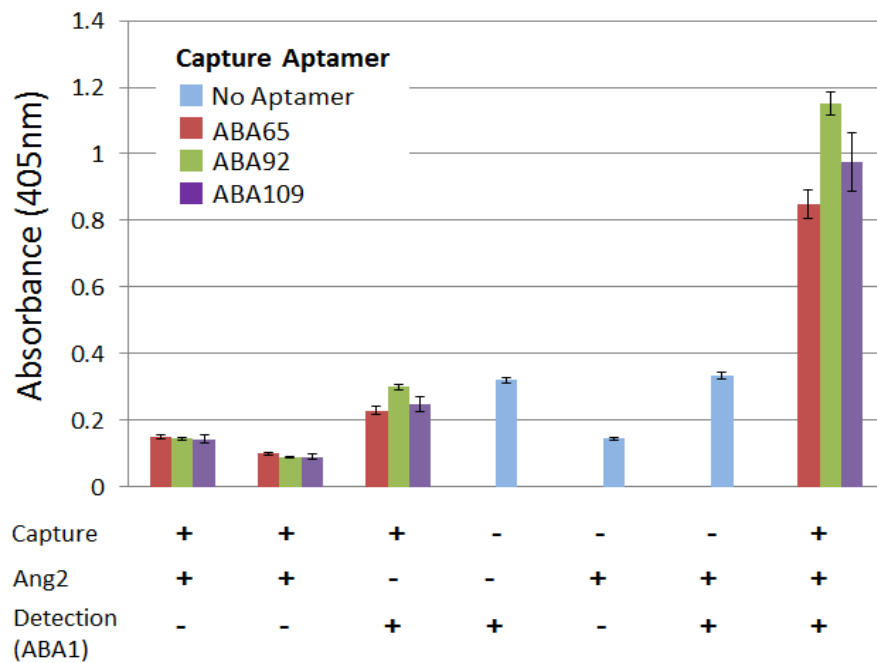

**Figure S2.** Control experiments for aptamer pair binding. Enzyme-linked oligonucleotide assay (ELONA) experiments demonstrate that labeling both the capture and detection aptamers with biotin achieved sufficient signal-to-noise performance, as shown by the low background signals obtained in control experiments using both biotinylated aptamers. Error bars represent triplicate measurements.

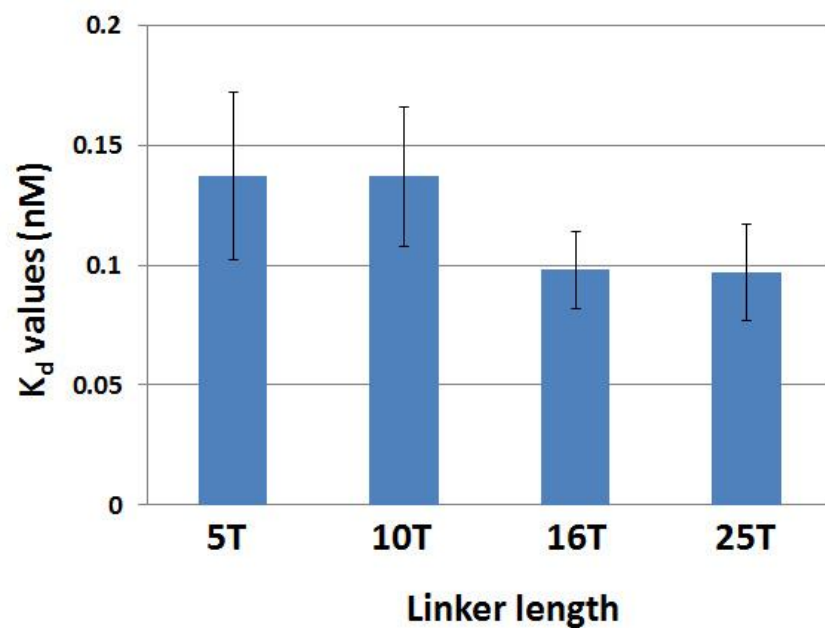

**Figure S3.** Contribution of linker length to binding affinity for bidentate aptamer reagents. We connected ABA1 to ABA65 with flexible poly-T linkers of different lengths, and measured their binding affinities using a bead-based fluorescence assay. The ABA1-ABA65 construct with a 25T linker showed the highest binding affinity ( $K_d = 97 \pm 20$  pM). Error bars represent triplicate measurements.

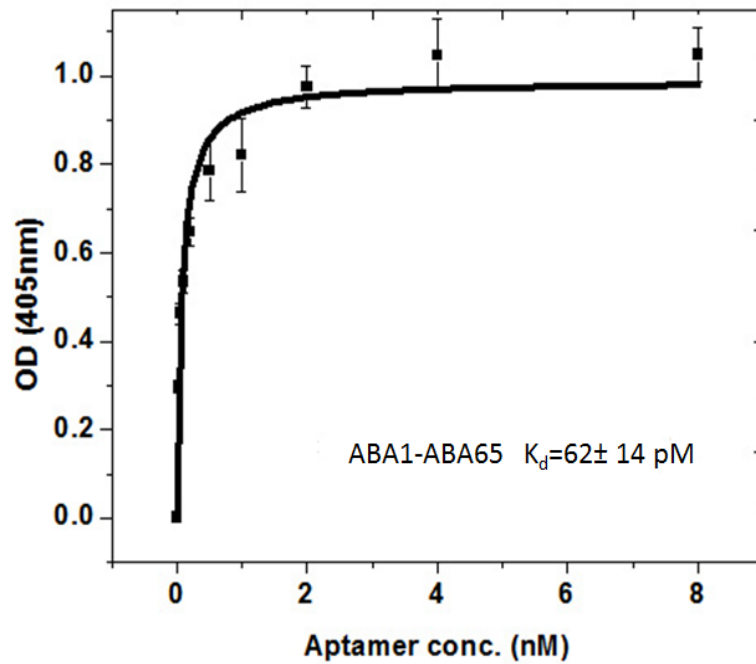

**Figure S4.** Binding affinity measurement for ABA1-ABA65 using ELONA. ABA1-ABA65 showed similar affinity as measured with ELONA in comparison to bead-based fluorescence binding assay measurements.

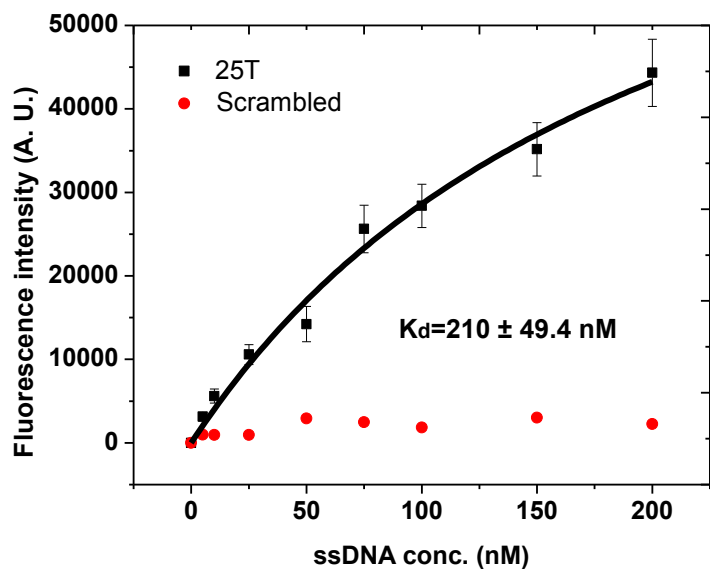

**Figure S5.** Binding affinity measurements for control sequences. The 25T linker alone showed minimal affinity to Ang2 ( $K_d = 210 \text{ nM}$ ) and a scrambled aptamer sequence showed negligible Ang2 binding.

**Table S1.** Aptamer array features

| <b>Aptamer sequences (5'--&gt;3')</b> |                                                                 |
|---------------------------------------|-----------------------------------------------------------------|
| Top 235 sequences                     | [40nt-aptamer sequence]                                         |
| Top 235 sequences + T linker          | [40nt-aptamer sequence]-TTTTTTTTTTTTTTTTTTTT                    |
| Top 235 sequences + reverse primer    | [40nt-aptamer sequence]-CCTATGCGTGCTACCGTGAA                    |
| forward + Top 235 sequences + reverse | AGGTCAGATG-[40nt-aptamer sequence]-CCTATGCGTG                   |
| <b>Control sequences (5'--&gt;3')</b> |                                                                 |
| 20-nt poly T linker                   | TTTTTTTTTTTTTTTTTTTT                                            |
| 40-nt poly-T linker                   | TTTTTTTTTTTTTTTTTTTTTTTTTTTTTTTTTTTTTTTT                        |
| 60-nt poly-T linker                   | TTTTTTTTTTTTTTTTTTTTTTTTTTTTTTTTTTTTTTTTTTTTTTTTTTTTTTTTTTTT    |
| Reverse primer                        | CCTATGCGTGCTACCGTGAA                                            |
| Reverse primer +T linker              | CCTATGCGTGCTACCGTGAATTTTTTTTTTTTTTTTTTTTT                       |
| Forward + reverse primer              | AGCAGCACAGAGGTCAGATGCCTATGCGTGCTACCGTGAA                        |
| Forward+T linker+Reverse primer       | AGCAGCACAGAGGTCAGATGTTTTTTTTTTTTTTTTTTTTTCTATGCGTGCTACCGTGAA    |
| Scrambled sequence                    | GGGTTTGCGAAAGGGAAAGGGTTTGTGTTTTTGGGTTTT                         |
| Thrombin aptamer (15 nt) + T linker   | GGTTGGTGTGGTTGGTTTTTTTTTTTTTTTTTTTTTTTT                         |
| Thrombin aptamer (29 nt) + T linker   | AGTCCGTGGTAGGGCAGGTTGGGGTGACTTTTTTTTTTTTTTTTTTTTTTTTTTTTTTTTT   |
| PDGF-BB aptamer                       | CACAGGCTACGGCACGTAGAGCATCACCATGATCCTGTGTTTTTTTTTTTTTTTTTTTTTTTT |

**Table S2.** Screened aptamers, bidentate constructs and control sequences

| ID                | Sequence (5' →3')                              |
|-------------------|------------------------------------------------|
| Aptamer sequences |                                                |
| ABA1              | ACTTGTAGGGTTCGGCTGGTCAGGGTGTCCAAGTCTGTGG       |
| ABA65             | TTTGGGGTGGTTGGGGGTTGTTGTTTTGGGGGTGGAGGGT       |
| ABA92             | GGTGCCATTGGGGACTGCTCGGGATTGCGGACTTGGCATC       |
| ABA109            | GGGTGCCATTGGGGACTGCTCGGGATTGCGGACTTGGCAT       |
| ABA1-ABA65        | [ABA1]-TTTTTTTTTTTTTTTTTTTTTTTTTTTTTT-[ABA65]  |
| ABA1-ABA92        | [ABA1]-TTTTTTTTTTTTTTTTTTTTTTTTTTTTTT-[ABA92]  |
| ABA1-ABA109       | [ABA1]-TTTTTTTTTTTTTTTTTTTTTTTTTTTTTT-[ABA109] |
| Control sequences |                                                |
| SC                | GGGTTTGC GAAAGGGAAAGGGTTTGTGTTTTTTGGGTTTT      |
| ABA1-SC           | [ABA1]-TTTTTTTTTTTTTTTTTTTTTTTTTTTTTT-[SC]     |
| SC-ABA65          | [SC]-TTTTTTTTTTTTTTTTTTTTTTTTTTTTTT-[ABA65]    |
| ABA1-25T          | [ABA1]-TTTTTTTTTTTTTTTTTTTTTTTTTTTTTT          |
| 25T-ABA65         | TTTTTTTTTTTTTTTTTTTTTTTTTTTTTT-[ABA65]         |

## References

1. M. Cho, S. S. Oh, J. Nie, R. Stewart, M. S. Eisenstein, J. Chambers, J. D. Marth, F. Walker, J. A. Thomson, H. T. Soh, *Proc. Natl. Acad. Sci. U.S.A.* **2013**, *110*, 18460-18465.
